# Supplementary material
Source: publisher figshare collection journal article supplement (https://acs.figshare.com/ndownloader/files/3859099)
Supplement: Supplementary file 1 [file 3859099]

# Label-Free Measurement of Cell-Electrode Cleft Gap Distance with High Spatial Resolution Surface Plasmon Microscopy

Koji Toma,<sup>a,†,\*</sup> Hiroshi Kano,<sup>b</sup> and Andreas Offenhäusser<sup>a</sup>

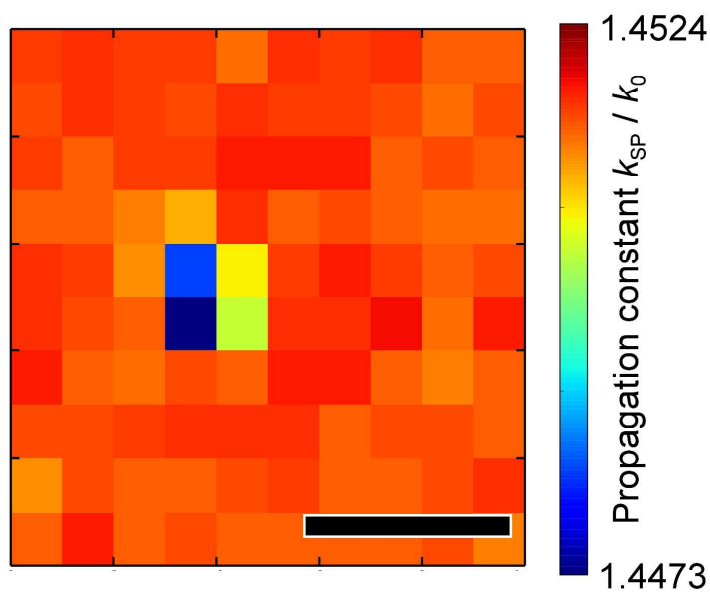

**Figure S1.** SPR propagation constant of a bare gold film in water measured with SLSPM. The scale bar is 4  $\mu\text{m}$ .
